# Supplementary material
Source: PubMed Central journal article supplement (PMC2756972)
Supplement: NIHMS51705-supplement-SF1.pdf [file NIHMS51705-supplement-SF1.pdf]

## Supplemental Figure 1

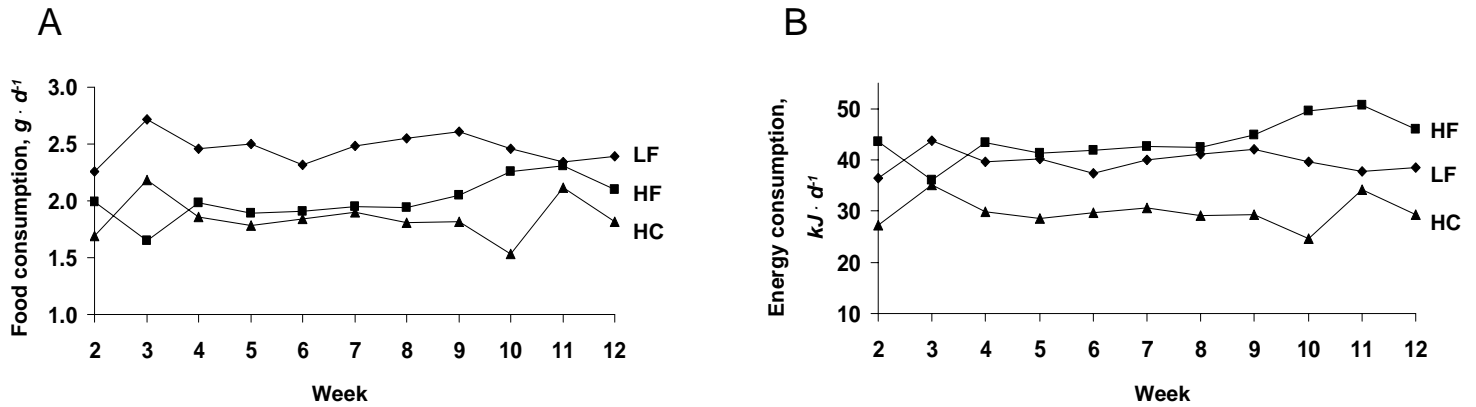

**Supplemental Figure 1.** Quantity of solid food consumed daily per mouse (A) and energy of solid food consumed daily per mouse (B) in mice fed a low-fat diet, high-fat diet, or high-carbohydrate diet. Food intake and energy consumption data on HC mice do not include liquid formula intake, which could not be quantitated. Each value represents one measurement of the amount of food or energy consumed for a cage of multiple mice, divided by the number of mice in that cage;  $n = 10$  per group. \*Mean food intake (LF  $2.46 \pm 0.13$  g · d<sup>-1</sup>, HF  $2.0 \pm 0.18$  g · d<sup>-1</sup>, HC  $1.85 \pm 0.18$  g · d<sup>-1</sup>) and energy consumption (LF  $44 \pm 4$  kJ · d<sup>-1</sup>, HF  $40 \pm 2$  kJ · d<sup>-1</sup>, HC  $30 \pm 3$  kJ · d<sup>-1</sup>) over 12 weeks differed significantly between all groups as determined by one-way ANOVA followed by Student-Newman-Keuls multiple comparisons test;  $P < 0.05$ .
