# Supplementary material
Source: PubMed Central journal article supplement (PMC2756972)
Supplement: NIHMS51705-supplement-SF2.pdf [file NIHMS51705-supplement-SF2.pdf]

## Supplemental figure 2

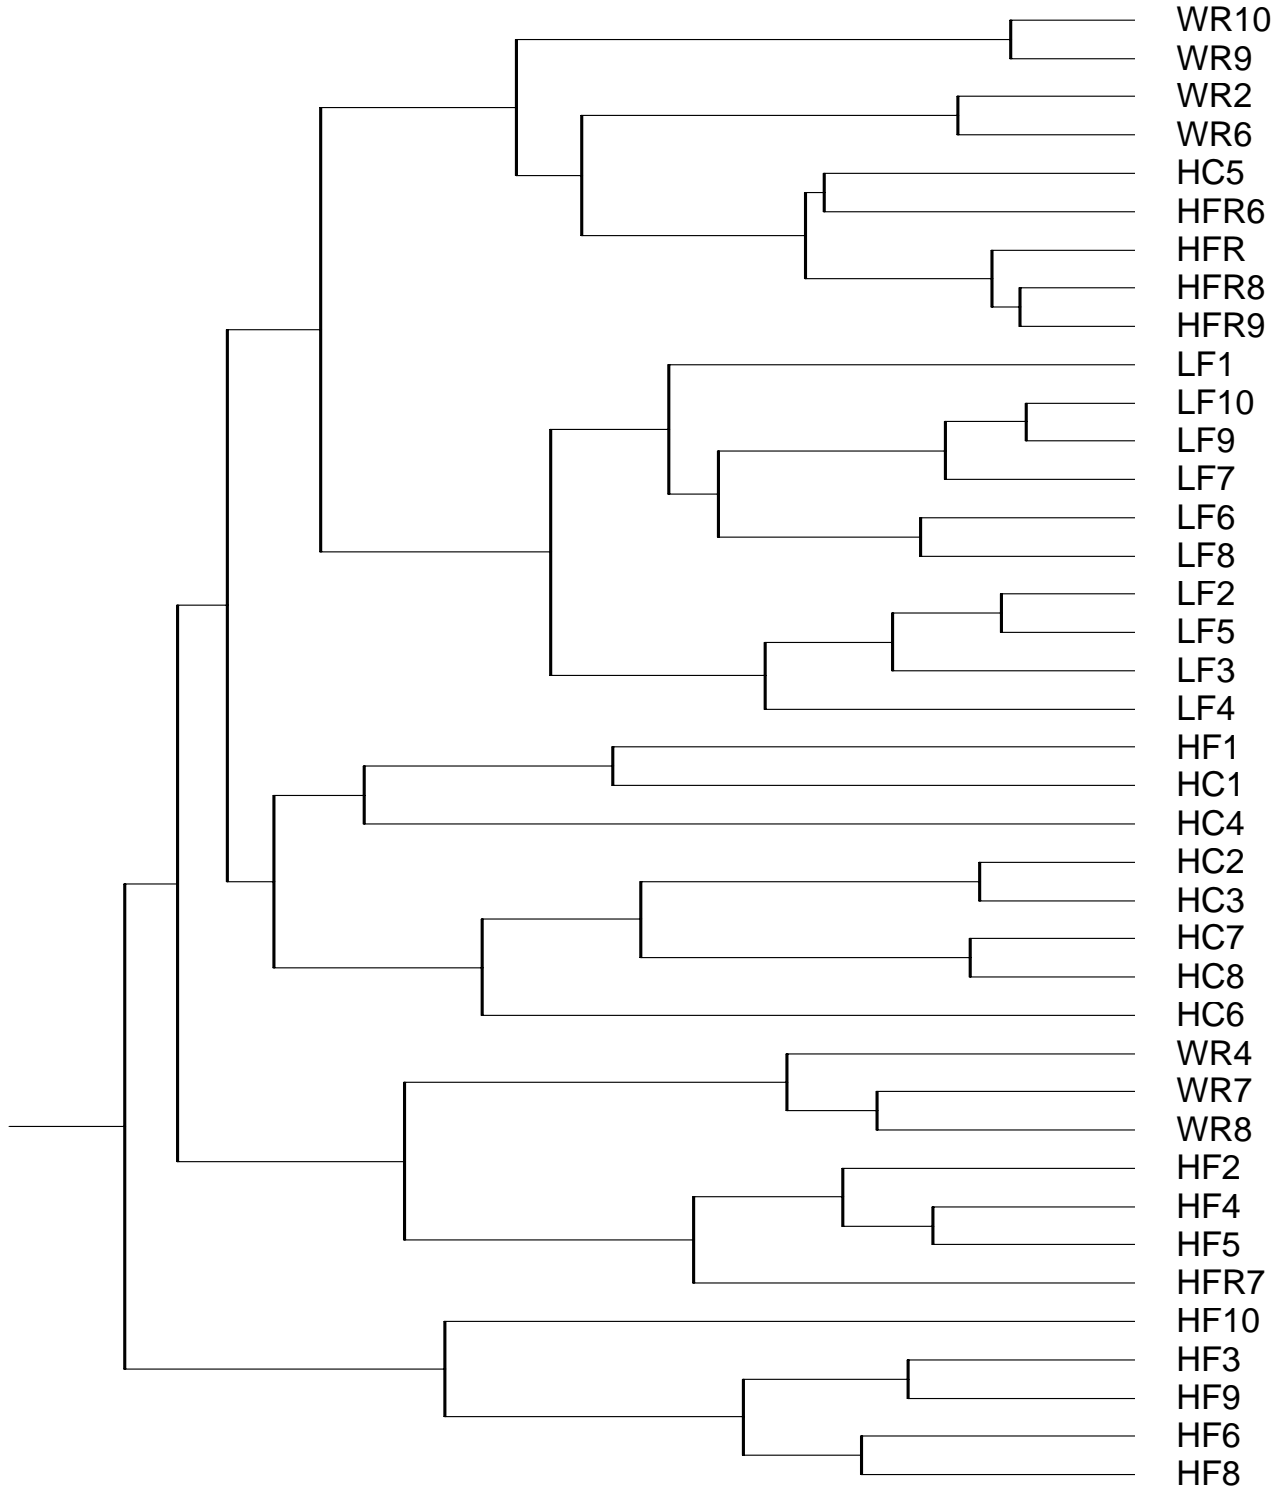

**Supplemental Figure 2.** Hierarchical clustering analysis of total adipocyte gene expression in mice fed a low-fat diet, high-fat diet, high-fat/energy-restricted diet, high-carbohydrate diet, or high-fat diet followed by weight reduction. Analysis was performed using Illumina BeadStudio software version 1.5. N = 5-10 per group.
