# Supplementary material
Source: PubMed Central journal article supplement (PMC2756972)
Supplement: NIHMS51705-supplement-ST1.pdf [file NIHMS51705-supplement-ST1.pdf]

**Supplemental Table 1.** Composition of commercially prepared high-fat and low-fat diets

|                     | High-Fat<br>Diet <sup>1</sup> | Low-Fat<br>Diet <sup>2</sup> |
|---------------------|-------------------------------|------------------------------|
|                     | energy %                      |                              |
| Protein             | 20                            | 20                           |
| Carbohydrate        | 20                            | 70                           |
| Fat                 | 60                            | 10                           |
|                     | g/kg diet                     |                              |
| Ingredient          |                               |                              |
| Casein              | 200                           | 200                          |
| L-cystine           | 3                             | 3                            |
| Corn Starch         | 0                             | 315                          |
| Maltodextrin 10     | 125                           | 35                           |
| Sucrose             | 68.8                          | 350                          |
| Cellulose           | 50                            | 50                           |
| Soybean Oil         | 25                            | 25                           |
| Lard                | 245                           | 20                           |
| Mineral Mix         | 10                            | 10                           |
| Dicalcium Phosphate | 13                            | 13                           |
| Calcium Carbonate   | 5.5                           | 5.5                          |
| Potassium Citrate   | 16.5                          | 16.5                         |
| Vitamin Mix         | 10                            | 10                           |
| Choline Bitartate   | 2                             | 2                            |

<sup>1</sup> D12492, Research Diets<sup>2</sup> D12450B, Research Diets
