# Supplementary material
Source: PubMed Central journal article supplement (PMC2756972)
Supplement: NIHMS51705-supplement-ST2.pdf [file NIHMS51705-supplement-ST2.pdf]

**Supplemental Table 2.** Oligonucleotide primer sequences used for RT-PCR.<sup>1</sup>

| Symbol | Forward (5' to 3')      | Reverse (5' to 3')      |
|--------|-------------------------|-------------------------|
| 18S    | TGGTTGATCCTGCCAGTAG     | CGACCAAAGGAACCATAACT    |
| ADN    | ACGTACCATGACGGGGTAGTAC  | CACGTAACCACACCTTCGACTGC |
| HSD    | TGGAGGTCAACTTCCTCAGC    | AAGAACCCATCCAGAGCAA     |
| TNF    | TCAGCCTCTTCTCATTCTGCT   | ACTGATGAGAGGGAGGCCATTT  |
| UCP2   | TCGCCTCCCCTGTTGATGTGGTC | GGAAGGAGGGACCCCGCGC     |

<sup>1</sup>Primers were designed using the Primer3 web application (34) and synthesized by Integrated DNA Technologies (Coralville, IA).
