# Supplementary material
Source: PubMed Central journal article supplement (PMC2756972)
Supplement: NIHMS51705-supplement-ST3a.pdf [file NIHMS51705-supplement-ST3a.pdf]

**Supplemental Table 4.** Top networks of genes with significantly different expression in comparisons of HF vs. LF, WR vs. LF, WR vs. HF, and HC vs. HFR as identified by Ingenuity Pathways Analysis.<sup>1</sup>

| <b>HF vs. LF</b>                                                                                                                            |                                                                                                                                                                             |                                                                                                     |
|---------------------------------------------------------------------------------------------------------------------------------------------|-----------------------------------------------------------------------------------------------------------------------------------------------------------------------------|-----------------------------------------------------------------------------------------------------|
| Network                                                                                                                                     | Upregulated                                                                                                                                                                 | Downregulated                                                                                       |
| Connective Tissue Disorders, Immunological Disease, Inflammatory Disease                                                                    | ADAM8, CCL9, CD274, CDC42EP4, CH25H, CLEC4E, COL16A1, CTSZ, CXCL16, GFPT2, HAS1, MYO9B, OASL, PDPN, PLA2G7, PLD3, SLFN2, TNF, TREM2, UBD                                    | BCL7A, CIB2, CIDEA, CTSF, DAB2IP, GSTT1, KIAA1881, OPTN, PHGDH, PXMP2, RASD1, ST3GAL6, TRAFD1, UCK1 |
| Cell-To-Cell Signaling and Interaction, Tissue Development, Cellular Movement                                                               | ADAMTS4, CASP1, CASP4, CCL4, CCL5, CCND1, CD9, COL1A1, CORO1A, CTSB, DAB2, FN1, IFITM3, ITGAV, LRG1, MMP19, MTPN, OSTF1, PLAT, PLAU, PLAUR, SPP1, ST6GAL1, TGFB2, TGM2, TNC | ATF3, CP, H6PD, TF, VHL                                                                             |
| Immune Response, Inflammatory Disease, Cell-To-Cell Signaling and Interaction                                                               | CCRL2, CD74, CERK, CSF2RA, CSF2RB, CTSS, CYB5R3, EMR1, HLA-DMB, HLA-DQA1, HLA-DQB2, HLA-DRB1, HPR, IL1B, IL3RA, PSCDBP, SEP15, SNAP23, SPI1, STX11, TNFAIP2, UGCG           | CD1D, G0S2, GEM, NFKBIZ, PIM3, SLC1A3, SLC25A25, UAP1                                               |
| Hematological System Development and Function, Immune and Lymphatic System Development and Function, Tissue Morphology                      | BCL2A1, CAV2, CD14, CD83, DCTN1, EVL, FYB, GDI2, HMGA1, IL15, IRF5, ISG15, MCL1, OAS1, PIM1, PLSCR1, PTP4A2, PVALB, RAB5C, RAB6A, SDC3, SDCBP, SRGN, TGOLN2, TLR2           | DST, IRF1, PPP1R9B, PYGL                                                                            |
| Connective Tissue Disorders, Genetic Disorder, Renal and Urological Disease                                                                 | C1QA, CAPRIN1, CD48, CD53, CENPA, DCN, ENO2, FSTL1, GPNMB, IL6, LY86, MMP2, MMP12, MMP13, MMP14, S100A4, STOM, TIMP1, TIMP2                                                 | FCGRT, GSTA4, LGALS4, PCSK6, PTGER3, RORC, SFRS5, SLC27A1, TIMP4                                    |
| Cell Cycle, Cellular Growth and Proliferation, Cancer                                                                                       | CDKN1A, CDT1, CREG1, EIF5A, FGF13, H2AFZ, HIST1H2AB, HNRNPA2B1, IFI16, KLF6, LUM, MCM5, MCM6, NUP62, PCNA, PF4, PLK2, PSAP, STMN1, TPX2, UHRF1, VPS18                       | CABLES1, GADD45G, MEIS1, SORT1, SSPN, TCN2                                                          |
| Cell-To-Cell Signaling and Interaction, Hematological System Development and Function, Immune and Lymphatic System Development and Function | ANPEP, CFB, CCL3, CKB, CXCL3, ETS, F10, F2R, GRN, GUSB, IGFBP5, LMO2, MAN1C1, MAN2B1, PITPNA, RHOJ, STARD8, THBS1, VCAM1                                                    | C6, CYR61, HK2, IGFBP4, LDB1, NDRG1, NTRK2, PRTN3, THBS2, VEGFA                                     |

Online Supporting Material

|                                                                                                                        |                                                                                                                                                                 |                                                                                                             |
|------------------------------------------------------------------------------------------------------------------------|-----------------------------------------------------------------------------------------------------------------------------------------------------------------|-------------------------------------------------------------------------------------------------------------|
| Hematological System Development and Function, Immune and Lymphatic System Development and Function, Tissue Morphology | CD72, CD93, CSF1, CXCR4, CYBA, FCER1G, FCGR2A, FCGR3A, IL10, IL7R, INPP5D, ITGB2, LAT2, LILRB4, NCF2, NCF4, PLAGL2, PPAN, PTPN6, RAP1B, RASA1, SH3BP2           | CHKA, HOXA7, ID3, RBP4                                                                                      |
| Genetic Disorder, Neurological Disease, Amino Acid Metabolism                                                          | ACADM, EEF2, NPY, PMP22, PRKCD, PTPRC, PTPRE, RTN4, SLC6A6, UCP2                                                                                                | ACADSB, ADIPOR2, ADM, AKT2, CCNL1, CDO1, EGR2, HSD3B7, IVD, NPR2, PALM, PCCB, PFKFB3, PTPRM, S100A1, SLC2A3 |
| Hematological System Development and Function, Immune Response, Tissue Development                                     | ACTN4, ATP6V1B2, CAPG, GSN, ICAM1, IQGAP1, MARCKS, MSN, PFN1, PLEC1, PRKX, RAB8B, RCAN1, S100A6, SELP, SELPLG, TES, TPM1, TPM3, VIL2                            | ACTA1, ADRB3, ALDH2, ENC1, MKNK2                                                                            |
| <b>WR vs. LF</b>                                                                                                       |                                                                                                                                                                 |                                                                                                             |
| <b>Network</b>                                                                                                         | <b>Upregulated</b>                                                                                                                                              | <b>Downregulated</b>                                                                                        |
| Immunological Disease, Connective Tissue Disorders, Inflammatory Disease                                               | CCL6, CCL9, CD274, CDC42EP4, COL15A1, COL16A1, CTSZ, CXCL16, EXT1, GFPT2, MAFF, MFGE8, NNMT, PDPN, PLA2G7, PLD3, PPAP2A, SLFN2, TNF, TREM2, UBD                 | ARF4, BAG4, BCL7A, DAB2IP, G0S2, HMGN2, KIAA1881, NFKBIZ, PPP1R3C, RASA3, RASD1, ST3GAL6, ZFP36L1           |
| Cellular Development, Skeletal and Muscular System Development and Function, Cancer                                    | ATF4, ATP6V0D1, CDKN1A, CDT1, CTSK, EIF5A, FGF13, GDF15, IFI16, KLF4, LGALS3, MCM6, MTHFD2, PCBP1, PLK2, PPAN, PSAT1, RAB5C, SDC3, SDCBP, STMN1, SYP, TNFRSF12A | ASNS, DDIT4, ID3, MEIS1, TCF7L2, TSPAN7, ZBTB5                                                              |
| Cardiovascular System Development and Function, Organismal Development, Cancer                                         | CASP4, COL1A1, CTSB, IFI30, IGFBP5, LMNA, MMP2, MMP12, MMP14, MMP23B, PLAU, PLAUR, RANGAP1, SEMA3F, SLC25A1, SLC2A1, SPHK1, THBS1, TIMP1, TIMP2                 | ABTB1, ANP32A, LDB1, PTEN, RORC, TFPI, VEGFA                                                                |
| RNA Post-Transcriptional Modification, Gene Expression, RNA Trafficking                                                | ALDOA, BCAR1, CD83, Ck2, CREG1, DNASE1L1, DOT1L, E2f, EIF4A1, FBL, GRB2, HSP90AB1, MDM2, NEDD4L, PIP4K2A, SGK, STIP1, WDR1                                      | BIRC2, CDC37L1, DNAJC7, EIF4A2, EIF4G2, HTATSF1, PGRMC1, SFRS5, TACC2, USP3                                 |
| Cellular Movement, Cell Death, Hematological System Development and Function                                           | ALOX5AP, CASP1, CCL4, CCL5, CSF1, DUSP10, FAS, FCER1G, FEM1B, HIPK2, HMGA1, IL10, IRF8, JAK2, LAT2, LY6E, NEDD9, NFKB2, PLEC1, PTK2B, TNFSF13, TXNRD1           | IER2, IRF1, RPL30                                                                                           |

|                                                                                                                      |                                                                                                                                       |                                                                                  |
|----------------------------------------------------------------------------------------------------------------------|---------------------------------------------------------------------------------------------------------------------------------------|----------------------------------------------------------------------------------|
| Cellular Development, Lipid Metabolism, Small Molecule Biochemistry                                                  | ACADL, ACADM, BCL3, BLVRA, CSK, GUSB, IFITM1, LYZ, NFKB1, PCMT1, PEPD, PITPNA, RTN4                                                   | ACADSB, CES1, EGR1, EGR2, EGR4, FABP4, HOXA7, IRF4, MLYCD, PPARG, SATB1, TNFAIP3 |
| Cell-To-Cell Signaling and Interaction, Cardiovascular System Development and Function, Tissue Development           | C1QA, C1QB, C1QC, CCL3, CCRL2, CERK, ICAM1, IGFALS, IL1B, ITGAX, MARCKSL1, PHLDA1, PSCDBP, PTX3, RCAN1, S100A6, VCAM1                 | C2, C6, DBP, GEM, PIM3, PTP4A1, SLC1A3                                           |
| Behavior, Nervous System Development and Function, Hematological System Development and Function                     | ARNTL, ATP6V0A1, ATP6V1A, ATP6V1B2, CAPG, FGF1, FOSL1, LIPA, P2RY2, PFN1, SCN1B, TCAG7.1260, TCIRG1, THBD                             | ABCG1, ACTA1, ATP5I, DUSP4, HMGB1, NDRG1, PCK1, PER1, PPP1R10, PPP1R1A           |
| Hematological System Development and Function, Immune Response, Immune and Lymphatic System Development and Function | BCL2A1, BOK, CD14, CDC42EP2, CORO1A, HNRPK, IQGAP1, IRS3, ITGB2, MGP, PLTP, PRKCD, PRKCDBP, SELP, SELPLG, SERPING1, TYROBP, UCP2, VCL | ADIPOR2, AGT, GSTA3, HSD11B1, MYO1B                                              |
| Cellular Assembly and Organization, Cellular Movement, Gene Expression                                               | ARPC4, ARPC5, ARPC1A, ARPC1B, CTSH, FSTL1, GCLM, MSN, MYH9, MYLK, RAB8B, RNH1, S100A4, TNC, TPM1, TPM3                                | ARHGEF18, CUGBP2, FOS, GHR, KLHL2, MST1R, TEF                                    |

**WR vs. HF**

| Network                                                                        | Upregulated                                                                                | Downregulated                                                                                                                                                               |
|--------------------------------------------------------------------------------|--------------------------------------------------------------------------------------------|-----------------------------------------------------------------------------------------------------------------------------------------------------------------------------|
| Cellular Growth and Proliferation, Embryonic Development, Cellular Development | CHKA, CRIP2, FCGRT, GART, LAMB2, LIMS2, MAFF, MGST3, MYC, RPS19, SFXN1, SQRDL, SRXN1       | ANXA4, ATPIF1, CCL6, CD9, CD48, CD151, CPD, CSTB, ECM1, GCS1, GDI2, H2AFZ, LIMS1, LY6A, MRC1, PFKP, PLA1A, PMP22, PRDX1, SLC11A1, TAGLN2, TPD52                             |
| Connective Tissue Disorders, Immunological Disease, Inflammatory Disease       | ACADS, ALAD, AQP7, CIB2, CTSF, DGCR6, GSTT1, NFS1, OPTN, PDRG1, PHGDH, PXMP2, TRAFD1, UCK1 | ADAM8, ALCAM, CCL9, CD274, CH25H, CLEC4E, CTSZ, CXCL16, DEK, HAS1, MYO9B, OASL, PDPN, PLA2G7, PLD3, SLFN2, TNF, TNFAIP8, TREM2, UBD                                         |
| Molecular Transport, Drug Metabolism, Cell Death                               | CFD, GATA6, IRF1, PACSIN3, PTPRD, PTPRM, SH3GLB1, SH3GLB2, TF                              | ATP6AP1, ATP6V0A1, ATP6V0B, ATP6V1A, ATP6V1B2, ATP6V1C1, CASP1, CEBPA, CTSB, DIAPH1, DNASE1L1, EIF4G2, GLIPR1, IFIH1, ISG15, LMNA, MUP1, PFN1, PLP2, PTPRE, TBXAS1, TCIRG1, |

Online Supporting Material

|                                                                                                              |                                                                                                |                                                                                                                                                         |
|--------------------------------------------------------------------------------------------------------------|------------------------------------------------------------------------------------------------|---------------------------------------------------------------------------------------------------------------------------------------------------------|
| Cellular Growth and Proliferation, Cellular Movement, Connective Tissue Development and Function             | CDKN2C, FGF10, FGFR1, NPDC1, PER1, PTOV1, RASSF1, S100A13, SCN1B, SERTAD1, TENC1, UBTF         | BHLHB2, CCND1, CSNK1D, CTSH, DAB2, GJA1, GRN, IL10RB, LGALS3, LRG1, MARCKSL1, OSTF1, PF4, TGFBI, TGFB1, TGFB2, TMOD3                                    |
| Lipid Metabolism, Small Molecule Biochemistry, Molecular Transport                                           | ACO1, ACO2, CYP2E1, IRAK2, LONP1, NR1D1, ORM2, PIM3, PLA2G6, PTX3, SF1, SLC1A3, SLC25A25, UAP1 | CCRL2, CD83, CERK, CYB5R3, HPR, IL1A, IL1B, IL3RA, MAP3K7IP2, PDGFB, PSCDBP, SAA2, UGCG                                                                 |
| Cancer, Cellular Movement, Endocrine System Disorders                                                        | CP, CSDA, FOSB, GAS6, H6PD, JUN, RRAD, SLC27A1, TGIF1, TIMP4                                   | AXL, BTG1, CD68, DARS, EHD4, FOLR2, ITGAX, JDP2, MTPN, PLAT, S100A4, S100A6, TIMP1, TIMP2, TPM2, TPM3, UHRF1                                            |
| Cell Signaling, Nucleic Acid Metabolism, Small Molecule Biochemistry                                         | ADCY6, AKT2, CXCL9, GNA11, HOXA7, HSPB8, IER3, MCAM, NTRK2, PALM, RGS3, TSHR                   | CSF2RA, EDNRB, GNA13, GNAI1, GNAS, GNG2, GPI, IL7R, LAT2, LPXN, LY86, PLEK, SCAMP2, SNAP23, STX11,                                                      |
| Immune Response, Cell-To-Cell Signaling and Interaction, Connective Tissue Disorders                         | C4A, CARD10, CLPP, DDR1, IL15RA                                                                | C1QA, C1QB, C1QC, C3AR1, CD74, CD93, CTSS, DCN, EDG5, EMR1, HLA-DMA, HLA-DMB, HLA-DQA1, HLA-DQB2, HLA-DRB1, LGMN, MALT1, NUP62, PIP5K1A, SLC2A6, TNFSF9 |
| Cell Cycle, DNA Replication, Recombination, and Repair, Gene Expression                                      | BMP4, CABLES1, FHIT, GADD45G, HIST4H4, ID3, KLF4, TCN2                                         | ALOX5AP, CDKN1A, CDT1, FEN1, HIST1H2AB, HNRNPA2B1, ID2, IFI16, KLF6, LUM, MCM5, MCM6, PCNA, PLK2, SIPA1L1, TPX2, VGLL4                                  |
| Cell-To-Cell Signaling and Interaction, Immunological Disease, Hematological System Development and Function | ANKS1A, DUSP10, GPX3, NFIX, PCSK6, RHOU, SOD1                                                  | BCL2A1, CCL3, CCL4, CD14, CD40, CD86, CD200, CLEC7A, CTGF, F10, IL10, MMP2, MMP13, MMP14, SPI1, SPP1, TANK, TFEC, TRAF5                                 |

**HC vs. HFR**

| Network                                               | Upregulated                                                                                                                | Downregulated                                                                                                                                     |
|-------------------------------------------------------|----------------------------------------------------------------------------------------------------------------------------|---------------------------------------------------------------------------------------------------------------------------------------------------|
| Protein Synthesis, Cancer, Cell Cycle                 | BRD2, CDR2, FBL, IMPACT, LAMB2, MYO1B, NARS, NOP5/NOP58, PCBP1, PTGES, RBMS1, RIOK1, SRM, TSPAN7                           | AK2, ANXA2, ATPIF1, HNRPH1, MYC, PABPC1, PFKP, PTMA, RPL17, RPL19, RPL23, RPL32, RPL41, RPL27A, RPS5, RPS14, RPS18, RPS20, RPS25, SLC11A1, TAGLN2 |
| Cell Morphology, Cellular Development, Cell Signaling | BAIAP2, BCAR1, CLIP1, DDEF1, EGFR, FUT8, LRIG1, NCK2, NXF1, PACSIN3, PTK2B, SFRS1, SFRS2, SFRS2IP, SNX9, SPG20, WASL, XPO6 | ACTB, BCAR3, CLK1, CNN3, DEGS1, GNB2L1, GSN, HPR, LIMS1, LIMS2, SFRS5, TAPBP                                                                      |

## Online Supporting Material

|                                                                                                                                       |                                                                                                        |                                                                                                                         |
|---------------------------------------------------------------------------------------------------------------------------------------|--------------------------------------------------------------------------------------------------------|-------------------------------------------------------------------------------------------------------------------------|
| Immune Response, Inflammatory Disease, Gene Expression                                                                                | ARIH1, CYLD, DDR1, HDGF, IFIT2, IRF2, IRF8, MAP3K8, MAP3K7IP2, PIP5K1A, TNFAIP8, TNIP1, UBE2E2, UBE2G1 | ACADL, CFB, CFP, CTSS, CXCL3, EMR1, HLA-G, HMGB1, IRF1, PIM3, PNPT1, SLPI, TRIM25, TRPC4AP, UBE2V1                      |
| Gene Expression, Organ Development, Cell Death                                                                                        | ATN1, CSNK1E, CUTL1, DOT1L, ECE1, EHMT2, GATA6, PBEF1, PURB, RELB, SATB1, SIRT1, SRRM2, TANK, TGFB1    | BCL3, BCL2A1, C4B, CBX3, CSNK1G2, FABP4, H3F3A, HBA2, HBB, NPC2, RBBP4, SCARB1, SMAD6, UBB                              |
| Cellular Compromise, Cellular Function and Maintenance, Drug Metabolism                                                               | AKT1S1, C6, CDC37L1, CSRP1, CTPS, DAPK1, NDEL1, NEDD4L, PAPOLA, PSME3, ZHX2                            | ATP5A1, ATP5G3, ATP5I, ATP6V0A1, CTSB, DNAJB1, DNAJB4, DNAJC15, DNASE1L1, HSP90AA1, HSP90AB1, MTCH1, RPS3, YWHAE, YWHAZ |
| Cancer, Cell Morphology, Connective Tissue Disorders                                                                                  | AMD1, ATXN2, BMP1, CLU, GCLM, GGA2, LOX, MERTK, NFIX, PON1, PRKD1, RPS6KA3, RRAS2, SLC19A1, SORT1      | ALAS1, FOS, FSTL1, JUN, PSAP, RPS6, RPS7, SNCG, SNX3, SPTBN1, UBA52                                                     |
| Cardiovascular System Development and Function, Cell-To-Cell Signaling and Interaction, Hematological System Development and Function | AGT, BOK, CDKN2B, COL4A1, EIF5, EIF1AY, EIF2B1, HSD11B1, MEST, OGT, SLC2A1, THBS1, THBS2, VLDLR        | CCT5, CD36, CPT2, CYBA, EPHX2, IGFBP4, LRG1, LTA4H, NCF2, PLAU, SPARC, VHL                                              |
| Cell Death, Connective Tissue Disorders, Dermatological Diseases and Conditions                                                       | ABCC3, CP, HTATSF1, ITGA6, RDBP, SNAPC4, TWIST1, UBTF                                                  | CAT, CYR61, EGR1, EGR2, FTL1, FXVD5, GEM, GSTM1, ID1, LTC4S, LYZ, MCL1, PDLIM1, SNURF, UBD, UCK1, ZFP36L1               |
| Cellular Assembly and Organization, Cellular Compromise, Nervous System Development and Function                                      | ACTA1, CAMK2D, DVL1, LETMD1, MARCKS, MYH9, PABPN1, PHGDH, PKD2, PPP1R12A, SLC30A5, SSH1, TCN2          | CDKN1A, EIF5A, HNRNPA2B1, ID2, MSN, MYL6, RPL11, S100A4, STMN1, TPI1                                                    |
| Cellular Growth and Proliferation, Auditory Disease, Cancer                                                                           | AES, ELF1, HIPK2, HMGA1, HMOX1, IL13RA2, PPAP2A, PPP1R14B, PPP2CB, SENP2, SLC12A2, STAT3, TLE1, TSHR   | CAV1, EPN2, FCER1G, FLT1, LY6E, PECAM1, PLD3, PPP1CA, PPP1R10, TENC1                                                    |

---

<sup>1</sup> Expression of all genes listed is significantly different between compared groups (P < 0.01)
